# Supplementary material for: Physiological, Immune Response, Antioxidant Capacity and Lipid Metabolism Changes in Grazing Sheep during the Cold Season
Source: MDPI journal article supplement (doi:10.3390/ani12182332), 2022-09-07
Supplement: s1 [file s1]

**Table S1.** The sequences of the primers and thermal conditions for qRT-PCR in the livers.

| Gene                            | Accession no.  | Sequences (5'-3')                                              | bp       |
|---------------------------------|----------------|----------------------------------------------------------------|----------|
| <i>PPAR-<math>\alpha</math></i> | FJ200440.1     | F: CACGGAGTTCGCCAAGTCCATC<br>R: CTTTGTTTCATCACAGAAGACAGCATCG   | 122      |
| <i>CPT1B</i>                    | NM_001009259.1 | F: GTCTGGGTGATGGGCATCTTCTTC<br>R: TCTGGTCAAGTGGCTGGTCTGG       | 105      |
| <i>ACOX1</i>                    | XM_015098942.2 | F: TGGCTACTTGAAGATGGACAACATATCG<br>R: CACGAGGAAGGACCTGATGAACAC | 148      |
| <i>UCP2</i>                     | NM_001280682.1 | F: ATCTCCCAATGTCGCTCGCAATG<br>R: AAGGCAGAAGTAAAGTGGCAAGGG      | 129      |
| <i><math>\beta</math>-actin</i> | NM_001009784   | F: CCCATTGAGCACGGCATT<br>R: GCAGGGGTGTTGAAGGTCTC               | 185      |
| <i>GAPDH</i>                    | AF022183       | F: TCCGTTGTGGATCTGACCTG<br>R: AGAGTGAGTGTGCTGTTGAAGT           | 156      |
| Thermal conditions              |                |                                                                |          |
| Stage                           | Reps           | Temperatures, °C                                               | Times, s |
| Initial step                    | 1              | 95                                                             | 30       |
| Melt                            | 40             | 95                                                             | 5        |
| Anneal/Extend                   | 40             | 60                                                             | 34       |

Abbreviations: *UCP2* = Uncoupling protein 2; *PPAR- $\alpha$*  = Peroxisome proliferator-activated receptor alpha; *ACOX1* = acyl-CoA oxidase 1; *CPT1B* = carnitine palmitoyl transferase 1B;  *$\beta$ -actin* = beta-actin; *GAPDH* = Glyceraldehyde-3-phosphate dehydrogenase.
